# Supplementary material for: Honey Environmental DNA Can Be Used to Detect and Monitor Honey Bee Pests: Development of Methods Useful to Identify Aethina tumida and Galleria mellonella Infestations
Source: MDPI journal article supplement (doi:10.3390/vetsci9050213), 2022-04-27
Supplement: s1 [file s1]

## Supplementary Material

# Honey Environmental DNA Can Be Used to Detect and Monitor Honey Bee Pests: Development of Methods Useful to Identify *Aethina tumida* and *Galleria mellonella* Infestations

Anisa Ribani <sup>1</sup>, Valeria Taurisano <sup>1</sup>, Valerio Joe Utzeri <sup>1</sup> and Luca Fontanesi <sup>1,\*</sup>

**Table S1.** List of honey samples analysed in this study. Samples have been listed according to the production region, from North to South of Italy.

| No. | Honey sample        | Region of Italy <sup>1</sup> | Year of production | Amplification <sup>2</sup> |
|-----|---------------------|------------------------------|--------------------|----------------------------|
| 1   | Chestnut            | Piedmont                     | 2012               | G                          |
| 2   | Chestnut            | Piedmont                     | 2018               | G                          |
| 3   | Honeydew            | Piedmont                     | 2018               | G                          |
| 4   | Honeydew            | Valle d'Aosta                | 2018               | G                          |
| 5   | Honeydew            | Valle d'Aosta                | 2018               | G                          |
| 6   | Honeydew            | Lombardy                     | 2018               | G                          |
| 7   | Apple tree          | Trentino-Alto Adige          | 2018               | G                          |
| 8   | Rhododendron        | Trentino-Alto Adige          | 2018               | G                          |
| 9   | Honeydew            | Trentino-Alto Adige          | 2018               | -                          |
| 10  | Eucalyptus          | Veneto                       | 2018               | G                          |
| 11  | Honeydew            | Veneto                       | 2018               | G                          |
| 12  | Honeydew            | Veneto                       | 2018               | G                          |
| 13  | Polyfloral          | Veneto                       | 2018               | -                          |
| 14  | Marasca cherry tree | Friuli-Venezia Giulia        | 2018               | G                          |
| 15  | Polyfloral          | Friuli-Venezia Giulia        | 2018               | -                          |
| 16  | Linden tree         | Friuli-Venezia Giulia        | 2018               | -                          |
| 17  | Linden tree         | Friuli-Venezia Giulia        | 2018               | -                          |
| 18  | Alfalfa             | Emilia-Romagna               | 2018               | G                          |
| 19  | Honeydew            | Emilia-Romagna               | 2018               | G                          |
| 20  | Polyfloral          | Emilia-Romagna               | 2018               | G                          |
| 21  | Dandelion           | Emilia-Romagna               | 2018               | -                          |
| 22  | Polyfloral          | Emilia-Romagna               | 2018               | G                          |
| 23  | Polyfloral          | Emilia-Romagna               | 2007               | G                          |
| 24  | Polyfloral          | Emilia-Romagna               | 2018               | -                          |
| 25  | Ailanthus           | Emilia-Romagna               | 2018               | -                          |
| 26  | Honeydew            | Emilia-Romagna               | 2018               | -                          |
| 27  | Polyfloral          | Emilia-Romagna               | 2010               | -                          |
| 28  | Polyfloral          | Emilia-Romagna               | 2018               | G                          |
| 29  | Acacia              | Tuscany                      | 2018               | G                          |
| 30  | Sunflower           | Tuscany                      | 2018               | G                          |

|   |    |               |            |      |     |
|---|----|---------------|------------|------|-----|
| 1 | 31 | Coriander     | Umbria     | 2018 | G   |
|   | 32 | Bramble       | Abruzzo    | 2018 | G   |
|   | 33 | Onion         | Abruzzo    | 2018 | -   |
|   | 34 | Hawthorn      | Abruzzo    | 2018 | -   |
|   | 35 | Sulla         | Molise     | 2018 | -   |
|   | 36 | Honeydew      | Campania   | 2018 | G   |
|   | 37 | Sulla         | Campania   | 2018 | -   |
|   | 38 | Polyfloral    | Basilicata | 2018 | G   |
|   | 39 | Acacia        | Calabria   | 2018 | -   |
|   | 40 | Orange        | Calabria   | 2018 | G   |
|   | 41 | Orange        | Calabria   | 2018 | -   |
|   | 42 | Eucalyptus    | Calabria   | 2018 | G   |
|   | 43 | Eucalyptus    | Calabria   | 2018 | G   |
|   | 44 | Orange        | Calabria   | 2018 | G   |
|   | 45 | Orange        | Calabria   | 2018 | -   |
|   | 46 | Orange        | Calabria   | 2018 | G   |
|   | 47 | Orange        | Calabria   | 2018 | G   |
|   | 48 | Orange        | Calabria   | 2019 | -   |
|   | 49 | Orange        | Calabria   | 2019 | G   |
|   | 50 | Eucalyptus    | Calabria   | 2019 | -   |
|   | 51 | Eucalyptus    | Calabria   | 2019 | G   |
|   | 52 | Orange        | Calabria   | 2019 | G/A |
|   | 53 | Orange        | Calabria   | 2019 | G   |
|   | 54 | Orange        | Calabria   | 2019 | -   |
|   | 55 | Dill          | Sicily     | 2018 | -   |
|   | 56 | Orange        | Sicily     | 2018 | G   |
|   | 57 | Orange        | Sicily     | 2018 | -   |
|   | 58 | Thistle       | Sicily     | 2018 | -   |
|   | 59 | Giant fennel  | Sicily     | 2018 | G   |
|   | 60 | Polyfloral    | Sicily     | 2018 | G   |
|   | 61 | Lemon         | Sicily     | 2018 | G   |
|   | 62 | Citrus fruits | Sicily     | 2018 | G   |
|   | 63 | Polyfloral    | Sicily     | 2018 | G   |
|   | 64 | Polyfloral    | Sicily     | 2018 | G   |
|   | 65 | Sulla         | Sicily     | 2018 | -   |
|   | 66 | Asphodel      | Sardinia   | 2018 | -   |
|   | 67 | Thistle       | Sardinia   | 2018 | G   |
|   | 68 | Thistle       | Sardinia   | 2018 | G   |
|   | 69 | Cherry tree   | Sardinia   | 2018 | G   |
|   | 70 | Cistus        | Sardinia   | 2018 | G   |
|   | 71 | Giant fennel  | Sardinia   | 2018 | G   |
|   | 72 | Lavender      | Sardinia   | 2018 | G   |
|   | 73 | Polyfloral    | Sardinia   | 2018 | G   |
|   | 74 | Rosemary      | Sardinia   | 2018 | G   |
|   | 75 | Linden        | Sardinia   | 2018 | -   |
|   | 76 | Thyme         | Sardinia   | 2018 | -   |
|   | 77 | Honeydew      | Sardinia   | 2018 | G   |
|   | 78 | Polyfloral    | Sardinia   | 2018 | G   |
|   | 79 | Thyme         | Sardinia   | 2018 | G   |

<sup>1</sup>Samples that produced an amplified fragment with the primer pairs designed on the COI gene for *Aethina tumida* are indicated with “A”, samples produced an amplified fragment with the primer pairs designed on the COI gene for *Galleia mellonella* are indicated with “G”, samples that did not produce any amplified fragments in all amplifications with the primer designed for these

---

two pest are indicated with “-”. Honey sample n. 52 was the only sample collected in the Calabria area where *A.tumida* was detected.
